# Supplementary material for: SARS-CoV-2 genomes from Saudi Arabia implicate nucleocapsid mutations in host response and increased viral load
Source: PubMed Central journal article supplement (PMC8807822; doi:10.1038/s41467-022-28287-8), 2022-02-01
Supplement: 41467_2022_28287_MOESM1_ESM.pdf [file 41467_2022_28287_MOESM1_ESM.pdf]

**SARS-CoV-2 genomes from Saudi Arabia implicate nucleocapsid mutations in host response and increased viral load**

Supplementary Information

### **Supplementary Note 1. Daily Cases in Saudi Arabia**

The numbers of Covid-19 cases registered in Saudi Arabian Cities were collected from The Ministry of Health Command Centre for COVID-19 (<https://covid19.moh.gov.sa>), Saudi Center of Disease Control and Prevention (<https://covid19.cdc.gov.sa>), the Saudi Press Agency (SPA) (<https://www.spa.gov.sa/search.php?lang=en&search=COVID>), The Saudi Ministry of Interior (<https://www.moi.gov.sa/>), and Algaissi *et al.*<sup>1</sup>.

**Supplementary Table S1. Cities providing samples**

| City           | Hospital                      | Total samples | Samples with patient outcome information | Deceased patients | Samples with R203K/G204R SNPs | R203K/G204R frequency |
|----------------|-------------------------------|---------------|------------------------------------------|-------------------|-------------------------------|-----------------------|
| Madinah        | General                       | 42            | 37                                       | 7                 | 2                             | 0.0476                |
|                | King Fahad Medical            | 16            | 14                                       | 6                 | 0                             | 0                     |
|                | Madinah Children Hospital     | 3             | 3                                        | 0                 | 0                             | 0                     |
|                | Ohoud                         | 251           | 238                                      | 63                | 8                             | 0.0319                |
| Makkah         | Al Zahir                      | 16            | 16                                       | 3                 | 3                             | 0.1875                |
|                | Al Noor                       | 71            | 69                                       | 0                 | 0                             | 0                     |
|                | Quarantine Hotel              | 144           | 144                                      | 0                 | 4                             | 0.0278                |
| Jeddah         | King Abdullah Medical Complex | 262           | 262                                      | 105               | 101                           | 0.3855                |
| Riyadh         | Sulaiman Al Habib             | 69            | 53                                       | 15                | 6                             | 0.0870                |
| Eastern Region | Sulaiman Al Habib, Eastern    | 18            | 14                                       | 0                 | 0                             | 0                     |
| <b>TOTAL</b>   |                               | <b>892</b>    | <b>850</b>                               | <b>199</b>        | <b>124</b>                    | <b>0.1390</b>         |

**Supplementary Table S2. Patient data and comorbidities**

|                     | Female | Male | No data available |
|---------------------|--------|------|-------------------|
| Number of patients  | 195    | 682  | 15                |
| Age range (years)   | 0-95   | 0-94 | .                 |
| Median age (years)  | 50     | 50   | .                 |
| Average age (years) | 49.8   | 49.2 | .                 |

|                 | Patients | Incidence | Mortality | Incidences reported in other studies <sup>2-8</sup> |
|-----------------|----------|-----------|-----------|-----------------------------------------------------|
| Diabetes        | 272      | 0.39      | 0.34      | 0.074-0.431                                         |
| Hypertension    | 238      | 0.35      | 0.35      | 0.095-0.375                                         |
| Cardiovascular  | 76       | 0.11      | 0.45      |                                                     |
| Lung BA         | 44       | 0.06      | 0.23      |                                                     |
| Kidney CDK      | 24       | 0.03      | 0.49      | 0.05-0.189                                          |
| Cerebrovascular | 10       | 0.01      | 0.40      |                                                     |
| Any comorbidity | 386      | 0.56      | 0.32      |                                                     |
| No comorbidity  | 303      | 0.44      | 0.24      |                                                     |

Notes: The patient samples without available sex information are also without age information. 203 patients have no available data on comorbidity, and these are not included in the incidence calculations. Only samples with available patient outcome information (850 samples) are included in the mortality calculations.

### Supplementary Table S3. Detected indels

| position | type | length | ref                                                                           | allele                                                                                                                                                                                                                                                                                                                           | sample count |
|----------|------|--------|-------------------------------------------------------------------------------|----------------------------------------------------------------------------------------------------------------------------------------------------------------------------------------------------------------------------------------------------------------------------------------------------------------------------------|--------------|
| 103      | del  | 2      | CTG                                                                           | C                                                                                                                                                                                                                                                                                                                                | 2            |
| 509      | del  | 9      | GGTCATGTTA                                                                    | G                                                                                                                                                                                                                                                                                                                                | 1            |
| 668      | del  | 3      | AGTT                                                                          | A                                                                                                                                                                                                                                                                                                                                | 3            |
| 685      | del  | 9      | AAAGTCATTT                                                                    | A                                                                                                                                                                                                                                                                                                                                | 4            |
| 898      | ins  | 262    | TTCATGCACTTTGTCCGAACAACCTGGACT<br>TTATTGACACTAAGAGGGGTGTATACTGC<br>TGCCGTGAAC | TTCATGCACTTTGTCCGAACAACCTGGACTTT<br>ATTGACACTAAGAGGGGTGTATACTGCTGCC<br>GTGAACCACTTTTTCTTTGCATTTACTTTTTTA<br>TAGGAACTCCTGTCATCACTCTCTCACACAC<br>ACACTTAGATGAACCTGATGGCTACCCTCTT<br>GAGTGCATTAAGACCTTCTAGCACGTGCTG<br>GTAAAGCCTCATGCACTTTGTCCGAACAAC<br>GGACTTTATTGACACTAAGAGGGGTGTATAC<br>TGCTGCCGTGAAC                           | 1            |
| 2463     | del  | 4      | TAAAA                                                                         | TAA                                                                                                                                                                                                                                                                                                                              | 1            |
| 2628     | del  | 3      | TTAT                                                                          | TT                                                                                                                                                                                                                                                                                                                               | 1            |
| 2882     | ins  | 282    | TGTGTTGTGGCAGATGCTGTC                                                         | TGTGTTGTGGCAGATGCTGTCGTGTTGTGGC<br>AGATGCTGTCGTGTTGTGGCAGATGCTGTCG<br>TGTTGTGGCAGATGCTGTCGTGTTGTGGCAG<br>AGGCTGCTCGTGTGTTGTGGCAGATGCTGTCG<br>TGTTGTGGCAGATGCTGTCGTGTTGTGGCAG<br>ATGCTGTAGTGTTCATCAGAGGCTGCTCGT<br>GTTGTGGCAGATGCTGTCGTGTTGTGGCAG<br>ATGCTGTCGTGTTGTGGCAGATGCTGTCGTG<br>TTGTGGCAGATGCTGTCGTGTTGTGGCAGAT<br>GCTGTC | 1            |
| 2882     | ins  | 141    | TGTGTTGTGGCAGATGCTGTC                                                         | TGTGTTGTGGCAGATGCTGTCGTGTTGTGGC                                                                                                                                                                                                                                                                                                  | 1            |

|       |     |     |                                                                                              |                                                                                                                                                                                                                                                                                                                                                       |   |
|-------|-----|-----|----------------------------------------------------------------------------------------------|-------------------------------------------------------------------------------------------------------------------------------------------------------------------------------------------------------------------------------------------------------------------------------------------------------------------------------------------------------|---|
|       |     |     |                                                                                              | AGATGCTGTCGTGTTGTGGCAGATGCTGTCG<br>TGTGTGGCAGATGCTGTCGTGTTGTGGCAG<br>ATGCTGTCGTGTTGCATCAGAGGCTGCTCGT<br>GTTGTGGCAGATGCTGTC                                                                                                                                                                                                                            |   |
| 7626  | ins | 49  | ATTGTGATACATTCTGTGCTGGTAGT                                                                   | ATTGTGATACATTCTGTGCTGGTAGTTGTGA<br>TACATTCTGTGCTGGTAGT                                                                                                                                                                                                                                                                                                | 2 |
| 10535 | del | 27  | TACATGCACCATATGGAATTACCAACTG                                                                 | T                                                                                                                                                                                                                                                                                                                                                     | 1 |
| 11074 | ins | 11  | CTTTTTTTT                                                                                    | CTTTTTTTTTT                                                                                                                                                                                                                                                                                                                                           | 1 |
| 18896 | ins | 309 | TTGTTAAGCGTGTGACTGGACTATTGAAT<br>ATCCTATAATTGGTGATGAACTGAAGATTA<br>ATGCGGCTTGTAGAAAGGTTCAACA | TTGTTAAGCGTGTGACTGGACTATTTAATAT<br>CCTATAATTGGTGATGAACTGAAGATTAATG<br>CGGCTTGTAGAAAGGTTCAACATAACATGTT<br>GTGCCAACCCAGCACTCCTGGGACCTCC<br>ACAGTGCACCTGGCAACCTCTGGGACTCCAT<br>CCTCCCTGCCTGGCCACACAGCCCCTGTCC<br>CTCTCTTGATACCATTACCCTCAACTTTACC<br>AGATGGGAATGTTAAGCGTGTGACTGGACT<br>ATTGAATATCCTATAATTGGTGATGAACTGAA<br>GATTAATGCGGCTTGTAGAAAGGTTCAACA | 1 |
| 19517 | del | 3   | TGTA                                                                                         | T                                                                                                                                                                                                                                                                                                                                                     | 1 |
| 21066 | del | 5   | TAAAAA                                                                                       | TAA                                                                                                                                                                                                                                                                                                                                                   | 1 |
| 21561 | del | 2   | CAA                                                                                          | CA                                                                                                                                                                                                                                                                                                                                                    | 2 |
| 21624 | del | 33  | GAACTCAATTACCCCTGCATACACTAATT<br>CTTT                                                        | G                                                                                                                                                                                                                                                                                                                                                     | 1 |
| 21740 | del | 45  | TCCAATGTTACTTGGTCCATGCTATACAT<br>GTCTCTGGGACCAATG                                            | TCCAATG                                                                                                                                                                                                                                                                                                                                               | 1 |
| 21781 | ins | 3   | CAA                                                                                          | CAAA                                                                                                                                                                                                                                                                                                                                                  | 1 |
| 21990 | del | 6   | TTTATTA                                                                                      | TTTA                                                                                                                                                                                                                                                                                                                                                  | 3 |
| 22048 | del | 3   | TGCG                                                                                         | T                                                                                                                                                                                                                                                                                                                                                     | 1 |
| 22288 | del | 6   | TGCTTTA                                                                                      | T                                                                                                                                                                                                                                                                                                                                                     | 1 |
| 22353 | del | 7   | CTTATTAT                                                                                     | CTTAT                                                                                                                                                                                                                                                                                                                                                 | 1 |

|       |     |    |                                |             |   |
|-------|-----|----|--------------------------------|-------------|---|
| 23701 | del | 1  | CA                             | C           | 1 |
| 27263 | del | 29 | CTTTTAAAGTTTCCATTTGGAATCTTGATT | CTT         | 1 |
| 27694 | del | 8  | TTTCTTATT                      | TTT         | 1 |
| 27697 | del | 5  | CTTATT                         | CTT         | 4 |
| 28949 | del | 11 | AGATTGAACCAG                   | A           | 1 |
| 29727 | del | 22 | TTTCACCGAGGCCACGCGGAGTA        | T           | 1 |
| 29755 | del | 1  | GA                             | G           | 2 |
| 29774 | del | 18 | CTAGGGAGAGCTGCCTATA            | CTA         | 3 |
| 29865 | ins | 5  | AA                             | AAAACA      | 1 |
| 29865 | ins | 7  | AA                             | AAACAACA    | 4 |
| 29865 | ins | 3  | AA                             | AACA        | 1 |
| 29865 | ins | 9  | AA                             | AACCACAACA  | 1 |
| 29865 | ins | 10 | AA                             | AAGCCACAACA | 1 |
| 29866 | ins | 3  | A                              | AACC        | 1 |
| 29866 | ins | 6  | A                              | AAGATGC     | 1 |
| 29866 | ins | 9  | A                              | AAGCAGCCTC  | 1 |
| 29866 | ins | 3  | A                              | AATG        | 1 |
| 29866 | ins | 8  | A                              | AGCAGATGC   | 1 |

**Supplementary Table S4. Relationship between Nextstrain clades and Pangolin lineages**

| <b>Nextstrain clade</b> | <b>Pangolin lineages</b> |
|-------------------------|--------------------------|
| 19A                     | B; B.40                  |
| 19B                     | A; A.1; A.2; A.3         |
| 20A                     | B.1; B.1.5               |
| 20A.EU1                 | B.1.177                  |
| 20A.EU2                 | B.1.160; B.1.160.6       |
| 20B                     | B.1.1; D.2               |
| 20B/501Y.V1             | B.1.1.7                  |
| 20C                     | B.1; B.1.2               |
| 20C/501Y.V2             | B.1.351                  |

Note: Clade and lineage assignments were retrieved from all samples available at GISAID on December 31st, 2020. Pangolin lineages constituting at least 10% of the samples assigned to a given Nextstrain clade are included in this table.



**Supplementary Table S5. Regression table for the association between R203K/G204R mutation and severity (ICU or deceased) adjusting for other mutations, sex, comorbidities, hospital and age.**

| Parameter                         | Log-Odds | SE       | 95% CI               | z         | p     |
|-----------------------------------|----------|----------|----------------------|-----------|-------|
| (Intercept)                       | -2.55    | 0.98     | [-4.46,-0.63]        | -2.61     | 0.009 |
| R203K/G204R                       | 1.18     | 0.49     | [0.22,2.13]          | 2.41      | 0.016 |
| C241T                             | -1.85    | 0.92     | [-3.65,-0.05]        | -2.01     | 0.044 |
| C1191T                            | -0.99    | 0.72     | [-2.40,0.43]         | -1.37     | 0.172 |
| C3037T                            | 0.26     | 0.37     | [-0.48,0.99]         | 0.69      | 0.493 |
| G10427A                           | 34.49    | 6.71e+07 | [-1.32e+08,1.32e+08] | 5.14e-07  | >.999 |
| C14408T                           | 2.40     | 1.03     | [0.38,4.41]          | 2.33      | 0.020 |
| C15352T                           | 32.04    | 3.87e+07 | [-7.59e+07,7.59e+07] | 8.27e-07  | >.999 |
| C18877T                           | 0.38     | 0.26     | [-0.14,0.90]         | 1.45      | 0.147 |
| A23403G                           | -0.32    | 0.27     | [-0.84,0.20]         | -1.19     | 0.234 |
| G25563T                           | -0.38    | 0.49     | [-1.33,0.58]         | -0.77     | 0.440 |
| C26735T                           | 0.48     | 0.57     | [-0.64,1.59]         | 0.84      | 0.403 |
| T27484C                           | 1.77     | 1.34     | [-0.85,4.39]         | 1.32      | 0.186 |
| C28139T                           | -1.61    | 7.50e+07 | [-1.47e+08,1.47e+08] | -2.15e-08 | >.999 |
| sex[M]                            | 0.13     | 0.25     | [-0.36,0.61]         | 0.52      | 0.605 |
| comorbidTRUE                      | 0.39     | 0.23     | [-0.05,0.84]         | 1.73      | 0.084 |
| hospital[GEN-MED]                 | 0.74     | 0.78     | [-0.79,2.28]         | 0.95      | 0.344 |
| hospital[KAMC]                    | 1.05     | 0.68     | [-0.28,2.39]         | 1.55      | 0.122 |
| hospital[KFMH]                    | 1.44     | 0.96     | [-0.43,3.32]         | 1.51      | 0.131 |
| hospital[MCH]                     | -30.06   | 4.75e+07 | [-9.30e+07,9.30e+07] | -6.34e-07 | >.999 |
| hospital[NOOR]                    | -2.04    | 1.00     | [-4.00,-0.08]        | -2.04     | 0.041 |
| hospital[HOUD]                    | 1.39     | 0.68     | [0.05,2.73]          | 2.03      | 0.043 |
| hospital[SULAIMANAHABIB]          | 4.51     | 1.23     | [2.10,6.92]          | 3.67      | <.001 |
| hospital[SULAIMANALHABIB eastern] | 0.44     | 0.92     | [-1.37,2.25]         | 0.48      | 0.632 |

| Parameter         | z     | df   | p     |
|-------------------|-------|------|-------|
| Smooth term (age) | 53.60 | 1.00 | <.001 |

Note: For each of the parameters, the table shows the regression coefficient estimate, standard error, and 95% confidence interval, and the two-sided z test and p-value testing the null hypothesis that the coefficient is equal to 0.

**Supplementary Table S6. Regression table for the association between R203K/G204R mutations and severity (ICU or deceased) adjusting for other mutations, sex, comorbidities, hospital, age and time.**

| Parameter                         | Log-Odds | SE       | 95% CI               | z         | p     |
|-----------------------------------|----------|----------|----------------------|-----------|-------|
| (Intercept)                       | -1.50    | 1.02     | [-3.50,0.50]         | -1.47     | 0.142 |
| R203K/G204R                       | 1.38     | 0.56     | [0.28,2.48]          | 2.46      | 0.014 |
| C241T                             | -2.46    | 1.02     | [-4.46,-0.46]        | -2.41     | 0.016 |
| C1191T                            | -1.29    | 0.83     | [-2.91,0.33]         | -1.57     | 0.117 |
| C3037T                            | 0.35     | 0.42     | [-0.47,1.18]         | 0.85      | 0.396 |
| G10427A                           | 34.66    | 6.71e+07 | [-1.32e+08,1.32e+08] | 5.16e-07  | >.999 |
| C14408T                           | 1.46     | 1.07     | [-0.63,3.55]         | 1.37      | 0.171 |
| C15352T                           | 32.65    | 3.87e+07 | [-7.59e+07,7.59e+07] | 8.43e-07  | >.999 |
| C18877T                           | 0.72     | 0.30     | [0.12,1.31]          | 2.37      | 0.018 |
| A23403G                           | 0.15     | 0.32     | [-0.48,0.77]         | 0.46      | 0.644 |
| G25563T                           | -0.38    | 0.58     | [-1.50,0.75]         | -0.65     | 0.514 |
| C26735T                           | 0.60     | 0.67     | [-0.72,1.91]         | 0.89      | 0.375 |
| T27484C                           | 0.94     | 1.41     | [-1.81,3.70]         | 0.67      | 0.503 |
| C28139T                           | 0.15     | 7.50e+07 | [-1.47e+08,1.47e+08] | 1.97e-09  | >.999 |
| sex[M]                            | 0.28     | 0.28     | [-0.27,0.83]         | 1.00      | 0.318 |
| comorbidTRUE                      | 0.27     | 0.24     | [-0.21,0.74]         | 1.11      | 0.266 |
| hospital[GEN-MED]                 | 1.35     | 0.88     | [-0.37,3.07]         | 1.54      | 0.123 |
| hospital[KAMC]                    | 0.82     | 0.71     | [-0.57,2.22]         | 1.16      | 0.248 |
| hospital[KFMH]                    | 1.98     | 0.99     | [0.03,3.93]          | 1.99      | 0.046 |
| hospital[MCH]                     | -33.79   | 4.75e+07 | [-9.30e+07,9.30e+07] | -7.12e-07 | >.999 |
| hospital[NOOR]                    | -1.98    | 1.08     | [-4.10,0.13]         | -1.84     | 0.066 |
| hospital[HOUD]                    | 0.86     | 0.74     | [-0.60,2.31]         | 1.15      | 0.249 |
| hospital[SULAIMANALHABIB]         | 4.16     | 1.51     | [1.19,7.13]          | 2.74      | 0.006 |
| hospital[SULAIMANALHABIB eastern] | 0.24     | 0.92     | [-1.57,2.05]         | 0.26      | 0.796 |

| Parameter                   | z     | df   | p     |
|-----------------------------|-------|------|-------|
| Smooth term (age)           | 36.72 | 1.00 | <.001 |
| Smooth term (sampling_time) | 52.41 | 7.01 | <.001 |

Note: For each of the parameters, the table shows the regression coefficient estimate, standard error, and 95% confidence interval, and the two-sided z test and p-value testing the null hypothesis that the coefficient is equal to 0.

**Supplementary Table S7. Regression table for the association between R203K/G204R mutations and mortality (deceased) adjusting for other mutations, sex, comorbidities, hospital and age.**

| Parameter                         | Log-Odd | SE      | 95% CI               | z        | p     |
|-----------------------------------|---------|---------|----------------------|----------|-------|
| (Intercept)                       | -2.07   | 0.95    | [-3.94,-0.21]        | -2.18    | 0.029 |
| R203K/G204R                       | 1.04    | 0.45    | [0.16,1.92]          | 2.31     | 0.021 |
| C241T                             | -1.44   | 0.84    | [-3.09,0.21]         | -1.71    | 0.088 |
| C1191T                            | -0.74   | 0.71    | [-2.13,0.65]         | -1.04    | 0.297 |
| C3037T                            | -0.12   | 0.34    | [-0.79,0.56]         | -0.34    | 0.735 |
| G10427A                           | 43.28   | 6.71e+0 | [-1.32e+08,1.32e+08] | 6.45e-07 | >.99  |
| C14408T                           | 1.26    | 0.97    | [-0.64,3.17]         | 1.30     | 0.193 |
| C15352T                           | 0.47    | 0.99    | [-1.48,2.41]         | 0.47     | 0.637 |
| C18877T                           | 0.34    | 0.24    | [-0.14,0.81]         | 1.38     | 0.166 |
| A23403G                           | -0.45   | 0.23    | [-0.90,0.00]         | -1.95    | 0.051 |
| G25563T                           | -0.15   | 0.47    | [-1.08,0.77]         | -0.33    | 0.742 |
| C26735T                           | 0.50    | 0.54    | [-0.55,1.56]         | 0.94     | 0.349 |
| T27484C                           | 1.18    | 0.98    | [-0.74,3.10]         | 1.20     | 0.229 |
| C28139T                           | -41.79  | 6.71e+0 | [-1.32e+08,1.32e+08] | -6.23e-0 | >.99  |
| sex[M]                            | 0.58    | 0.25    | [0.09,1.07]          | 2.33     | 0.020 |
| comorbidTRUE                      | 0.18    | 0.21    | [-0.23,0.59]         | 0.86     | 0.389 |
| hospital[GEN-MED]                 | 0.18    | 0.83    | [-1.45,1.81]         | 0.21     | 0.831 |
| hospital[KAMC]                    | 0.70    | 0.71    | [-0.69,2.10]         | 0.99     | 0.322 |
| hospital[KFMH]                    | 1.23    | 0.96    | [-0.64,3.11]         | 1.29     | 0.196 |
| hospital[MCH]                     | -39.31  | 3.87e+0 | [-7.59e+07,7.59e+07] | -1.01e-0 | >.99  |
| hospital[NOOR]                    | -41.24  | 8.14e+0 | [-1.60e+07,1.60e+07] | -5.07e-0 | >.99  |
| hospital[HOUD]                    | 0.48    | 0.71    | [-0.92,1.88]         | 0.68     | 0.499 |
| hospital[QRTN-MK]                 | -40.90  | 5.61e+0 | [-1.10e+07,1.10e+07] | -7.29e-0 | >.99  |
| hospital[SULAIMANALHABIB]         | 0.15    | 0.77    | [-1.36,1.67]         | 0.20     | 0.844 |
| hospital[SULAIMANALHABIB eastern] | -41.16  | 1.86e+0 | [-3.65e+07,3.65e+07] | -2.21e-0 | >.99  |

| Parameter         | z     | df   | p     |
|-------------------|-------|------|-------|
| Smooth term (age) | 37.74 | 1.00 | <.001 |

Note: For each of the parameters, the table shows the regression coefficient estimate, standard error, and 95% confidence interval, and the two-sided z test and p-value testing the null hypothesis that the coefficient is equal to 0.

**Supplementary Table S8. Regression table for the association between R203K/G204R mutations and mortality (deceased) adjusting for other mutations, sex, comorbidities, hospital, age and time.**

| Parameter                         | Log-Odds | SE       | 95% CI               | z         | p     |
|-----------------------------------|----------|----------|----------------------|-----------|-------|
| (Intercept)                       | -2.09    | 1.03     | [-4.11,-0.08]        | -2.03     | 0.042 |
| R203K/G204R                       | 0.58     | 0.50     | [-0.41,1.56]         | 1.15      | 0.249 |
| C241T                             | -1.55    | 0.86     | [-3.23,0.13]         | -1.80     | 0.071 |
| C1191T                            | -0.90    | 0.78     | [-2.43,0.63]         | -1.16     | 0.247 |
| C3037T                            | -0.17    | 0.38     | [-0.91,0.58]         | -0.44     | 0.661 |
| G10427A                           | 28.68    | 1.14e+06 | [-2.23e+06,2.23e+06] | 2.53e-05  | >.999 |
| C14408T                           | 0.74     | 0.99     | [-1.20,2.68]         | 0.75      | 0.454 |
| C15352T                           | -0.48    | 1.04     | [-2.53,1.56]         | -0.46     | 0.645 |
| C18877T                           | 0.40     | 0.27     | [-0.12,0.92]         | 1.50      | 0.133 |
| A23403G                           | 0.22     | 0.26     | [-0.29,0.73]         | 0.84      | 0.399 |
| G25563T                           | -0.14    | 0.52     | [-1.15,0.87]         | -0.27     | 0.783 |
| C26735T                           | 0.14     | 0.59     | [-1.01,1.30]         | 0.24      | 0.807 |
| T27484C                           | 0.62     | 0.99     | [-1.32,2.57]         | 0.63      | 0.529 |
| C28139T                           | -27.90   | 1.14e+06 | [-2.23e+06,2.23e+06] | -2.46e-05 | >.999 |
| sex[M]                            | 0.73     | 0.27     | [0.19,1.27]          | 2.67      | 0.008 |
| comorbidTRUE                      | 0.16     | 0.22     | [-0.28,0.59]         | 0.70      | 0.482 |
| hospital[GEN-MED]                 | 0.84     | 0.92     | [-0.97,2.65]         | 0.91      | 0.363 |
| hospital[KAMC]                    | 0.74     | 0.75     | [-0.72,2.21]         | 0.99      | 0.321 |
| hospital[KFMH]                    | 1.88     | 1.01     | [-0.10,3.85]         | 1.86      | 0.062 |
| hospital[MCH]                     | -39.67   | 3.87e+07 | [-7.59e+07,7.59e+07] | -1.02e-06 | >.999 |
| hospital[NOOR]                    | -40.77   | 8.14e+06 | [-1.60e+07,1.60e+07] | -5.01e-06 | >.999 |
| hospital[HOUD]                    | 0.30     | 0.76     | [-1.20,1.80]         | 0.39      | 0.696 |
| hospital[QR TN-MK]                | -40.17   | 5.61e+06 | [-1.10e+07,1.10e+07] | -7.16e-06 | >.999 |
| hospital[SULAIMANALHABIBHABIB]    | 0.40     | 0.86     | [-1.29,2.09]         | 0.47      | 0.641 |
| hospital[SULAIMANALHABIB eastern] | -41.16   | 1.86e+07 | [-3.65e+07,3.65e+07] | -2.21e-06 | >.999 |

  

| Parameter                   | F     | df   | p     |
|-----------------------------|-------|------|-------|
| Smooth term (age)           | 31.51 | 1.00 | <.001 |
| Smooth term (sampling_time) | 47.95 | 5.10 | <.001 |

Note: For each of the parameters, the table shows the regression coefficient estimate, standard error, and 95% confidence interval, and the two-sided z test and p-value testing the null hypothesis that the coefficient is equal to 0.

**Supplementary Table S9. Regression table for the association between R203K/G204R mutations and viral load (copynumber N1) adjusting for qPCRkit, other mutations, sex, comorbidities, hospital, age and time.**

| Parameter                         | Coefficient | SE   | 95% CI        | t     | p     |
|-----------------------------------|-------------|------|---------------|-------|-------|
| (Intercept)                       | 5.62        | 0.65 | [4.34,6.91]   | 8.59  | <.001 |
| R203K/G204R                       | 1.33        | 0.31 | [0.72,1.93]   | 4.30  | <.001 |
| qPCRkit[taqpath]                  | 1.19        | 0.31 | [0.59,1.80]   | 3.89  | <.001 |
| C241T                             | 0.57        | 0.46 | [-0.34,1.47]  | 1.23  | 0.221 |
| C1191T                            | 0.42        | 0.51 | [-0.58,1.43]  | 0.82  | 0.410 |
| C3037T                            | -0.61       | 0.25 | [-1.09,-0.13] | -2.47 | 0.014 |
| G10427A                           | -0.55       | 1.89 | [-4.25,3.15]  | -0.29 | 0.771 |
| C14408T                           | -1.47       | 0.53 | [-2.50,-0.43] | -2.77 | 0.006 |
| C15352T                           | 0.48        | 0.88 | [-1.25,2.21]  | 0.55  | 0.585 |
| C18877T                           | 0.13        | 0.16 | [-0.19,0.44]  | 0.79  | 0.429 |
| A23403G                           | 0.38        | 0.17 | [0.05,0.72]   | 2.25  | 0.025 |
| G25563T                           | -0.52       | 0.26 | [-1.04,0.00]  | -1.97 | 0.049 |
| C26735T                           | 1.39        | 0.28 | [0.83,1.94]   | 4.92  | <.001 |
| T27484C                           | 1.01        | 0.74 | [-0.44,2.47]  | 1.37  | 0.172 |
| C28139T                           | 0.86        | 2.05 | [-3.17,4.89]  | 0.42  | 0.676 |
| sex[M]                            | -0.16       | 0.17 | [-0.49,0.17]  | -0.95 | 0.342 |
| comorbidTRUE                      | 0.02        | 0.15 | [-0.29,0.32]  | 0.10  | 0.920 |
| hospital[GEN-MED]                 | -1.61       | 0.66 | [-2.90,-0.32] | -2.45 | 0.015 |
| hospital[KAMC]                    | -1.21       | 0.55 | [-2.29,-0.14] | -2.22 | 0.027 |
| hospital[KFMH]                    | -0.83       | 0.72 | [-2.25,0.59]  | -1.15 | 0.251 |
| hospital[MCH]                     | -2.52       | 1.28 | [-5.03,-0.01] | -1.97 | 0.049 |
| hospital[NOOR]                    | -1.92       | 0.61 | [-3.11,-0.72] | -3.15 | 0.002 |
| hospital[OHOU]                    | -0.90       | 0.56 | [-2.00,0.20]  | -1.61 | 0.108 |
| hospital[QRTN-MK]                 | -3.32       | 0.61 | [-4.52,-2.13] | -5.47 | <.001 |
| hospital[SULAIMANALHABIB]         | -1.42       | 0.64 | [-2.68,-0.17] | -2.23 | 0.026 |
| hospital[SULAIMANALHABIB eastern] | -2.47       | 0.73 | [-3.90,-1.04] | -3.39 | <.001 |

  

| Parameter                   | F    | df   | p     |
|-----------------------------|------|------|-------|
| Smooth term (age)           | 2.63 | 2.46 | 0.046 |
| Smooth term (sampling_time) | 4.89 | 8.02 | <.001 |

Note: For each of the parameters, the table shows the regression coefficient estimate, standard error, and 95% confidence interval, and the two-sided t test and p-value testing the null hypothesis that the coefficient is equal to 0.

**Supplementary Table S10. Primers used in the study**

**Primers used for cloning**

| Primer Name    | Sequence 5' to 3'               |
|----------------|---------------------------------|
| pLVX-N1-F1     | CTATTTCCGGTGAATTCGCCG           |
| pLVX-N1-R1     | GGGGCGGGATCCTTACTTTTC           |
| pLVX-N1-Mut-F1 | CCAGGGTCCAGTAAACGAACAAGTCCGGCGC |
| pLVX-N1-Mut-R1 | GCGCCGGACTTGTTTCGTTTACTGGACCTGG |

**Primers and Probe for SARS-CoV-2**

| Name                                       | Catalog#                                            |
|--------------------------------------------|-----------------------------------------------------|
| nCOV_N1 Forward Primer<br>Aliquot, 50 nmol | 10006821                                            |
| nCOV_N1 Reverse Primer Aliquot,<br>50 nmol | 10006822                                            |
| nCOV_N1 Probe Aliquot, 25 nmol             | 10006823                                            |
| nCOV_N2 Forward Primer<br>Aliquot, 50 nmol | 10006824                                            |
| nCOV_N2 Reverse Primer Aliquot,<br>50 nmol | 10006825                                            |
| nCOV_N2 Probe Aliquot, 25 nmol             | 10006826                                            |
| E gene E_Sarbeco_F                         | ACAGGTACGTTAATAGTTAATAGCGT                          |
| E_Sarbeco_R                                | ATATTGCAGCAGTACGCACACA                              |
| E_Sarbeco_P1                               | FAM-ACACTAGCCATCCTTACTGCGCTTCG-BBQ                  |
| 2019-nCoV (ORF1ab) (FAM dye)               | TaqMan™ 2019-nCoV Assay Kit v1<br>(Cat. No. A47532) |
| 2019-nCoV (S Gene) (FAM dye)               | TaqMan™ 2019-nCoV Assay Kit v1<br>(Cat. No. A47532) |

**Supplementary Table S11. Datasets associated with the MaxQuant analysis**

| <b>Experiment</b> | <b>Target Protein<br/>AP-MS</b>               | <b>Replicates</b> | <b>Technical<br/>Replicates</b> | <b>Raw Data File<br/>Designation<br/>(submitted to<br/>ProteomXchange)</b> |
|-------------------|-----------------------------------------------|-------------------|---------------------------------|----------------------------------------------------------------------------|
| <b>Mock AP-MS</b> | <b>Used as<br/>negative control<br/>AP-MS</b> | 1                 | NA                              | 20210701_C1.raw                                                            |
|                   |                                               | 2                 | NA                              | 20210701_C2.raw                                                            |
|                   |                                               | 3                 | NA                              | 20210701_C3.raw                                                            |

|                                          |                                                               |   |    |                   |
|------------------------------------------|---------------------------------------------------------------|---|----|-------------------|
| <b>N protein<br/>wildtype<br/>AP-MS</b>  | <b>Used for<br/>differential<br/>interaction<br/>analysis</b> | 1 | NA | N_wildtype_01.raw |
|                                          |                                                               | 2 | NA | N_wildtype_02.raw |
|                                          |                                                               | 3 | NA | N_wildtype_03.raw |
| <b>N protein<br/>KR-mutant<br/>AP-MS</b> | <b>Used for<br/>differential<br/>interaction<br/>analysis</b> | 1 | NA | N_mutant_01.raw   |
|                                          |                                                               | 2 | NA | N_mutant_02.raw   |
|                                          |                                                               | 3 | NA | N_mutant_03.raw   |

|                                         |                                                                |   |   |                    |
|-----------------------------------------|----------------------------------------------------------------|---|---|--------------------|
| <b>N protein<br/>wildtype<br/>AP-MS</b> | <b>Used for<br/>phosphorylation<br/>detection<br/>analysis</b> | 1 | 1 | 20210108_WT1_a.raw |
|                                         |                                                                |   | 2 | 20210108_WT1_b.raw |
|                                         |                                                                |   | 3 | 20210108_WT1_c.raw |
|                                         |                                                                | 2 | 1 | 20210108_WT2_a.raw |
|                                         |                                                                |   | 2 | 20210108_WT2_b.raw |
|                                         |                                                                |   | 3 | 20210108_WT2_c.raw |
|                                         |                                                                | 3 | 1 | 20210108_WT3_a.raw |
|                                         |                                                                |   | 2 | 20210108_WT3_b.raw |
|                                         |                                                                |   | 3 | 20210108_WT3_c.raw |
|                                         |                                                                | 4 | 1 | 20210108_WT4_a.raw |
|                                         |                                                                |   | 2 | 20210108_WT4_b.raw |

|                                          |                                                                |   |   |                    |
|------------------------------------------|----------------------------------------------------------------|---|---|--------------------|
|                                          |                                                                |   | 3 | 20210108_WT4_c.raw |
|                                          |                                                                | 5 | 1 | 20210108_WT5_a.raw |
|                                          |                                                                |   | 2 | 20210108_WT5_b.raw |
|                                          |                                                                |   | 3 | 20210108_WT5_c.raw |
| <b>N protein<br/>KR-mutant<br/>AP-MS</b> | <b>Used for<br/>phosphorylation<br/>detection<br/>analysis</b> |   | 1 | 1                  |
|                                          |                                                                | 2 |   | 20210108_M1_b.raw  |
|                                          |                                                                | 3 |   | 20210108_M1_c.raw  |
|                                          |                                                                | 2 | 1 | 20210108_M2_a.raw  |
|                                          |                                                                |   | 2 | 20210108_M2_b.raw  |
|                                          |                                                                |   | 3 | 20210108_M2_c.raw  |
|                                          |                                                                | 3 | 1 | 20210108_M3_a.raw  |
|                                          |                                                                |   | 2 | 20210108_M3_b.raw  |
|                                          |                                                                |   | 3 | 20210108_M3_c.raw  |
|                                          |                                                                | 4 | 1 | 20210108_M4_a.raw  |
|                                          |                                                                |   | 2 | 20210108_M4_b.raw  |
|                                          |                                                                |   | 3 | 20210108_M4_c.raw  |
|                                          |                                                                | 5 | 1 | 20210108_M5_a.raw  |
|                                          |                                                                |   | 2 | 20210108_M5_b.raw  |
|                                          |                                                                |   | 3 | 20210108_M5_c.raw  |

NA = Not Applicable



## Supplementary References

- 1 Algaissi, A. A., Alharbi, N. K., Hassanain, M. & Hashem, A. M. Preparedness and response to COVID-19 in Saudi Arabia: Building on MERS experience. *J Infect Public Health* **13**, 834-838, doi:10.1016/j.jiph.2020.04.016 (2020).
- 2 Barbu, M. G., Thompson, R. J., Thompson, D. C., Cretoiu, D. & Suci, N. The Impact of SARS-CoV-2 on the Most Common Comorbidities-A Retrospective Study on 814 COVID-19 Deaths in Romania. *Front Med (Lausanne)* **7**, 567199, doi:10.3389/fmed.2020.567199 (2020).
- 3 Reilev, M. *et al.* Characteristics and predictors of hospitalization and death in the first 11 122 cases with a positive RT-PCR test for SARS-CoV-2 in Denmark: a nationwide cohort. *Int J Epidemiol* **49**, 1468-1481, doi:10.1093/ije/dyaa140 (2020).
- 4 Yang, J. *et al.* Prevalence of comorbidities and its effects in patients infected with SARS-CoV-2: a systematic review and meta-analysis. *Int J Infect Dis* **94**, 91-95, doi:10.1016/j.ijid.2020.03.017 (2020).
- 5 Espinosa, O. A. *et al.* Prevalence of comorbidities in patients and mortality cases affected by SARS-CoV2: a systematic review and meta-analysis. *Rev Inst Med Trop Sao Paulo* **62**, e43, doi:10.1590/S1678-9946202062043 (2020).
- 6 Zhou, F. *et al.* Clinical course and risk factors for mortality of adult inpatients with COVID-19 in Wuhan, China: a retrospective cohort study. *Lancet* **395**, 1054-1062, doi:10.1016/S0140-6736(20)30566-3 (2020).
- 7 Pantea Stoian, A. *et al.* Death by SARS-CoV 2: a Romanian COVID-19 multi-centre comorbidity study. *Scientific reports* **10**, 21613, doi:10.1038/s41598-020-78575-w (2020).
- 8 Li, B. *et al.* Prevalence and impact of cardiovascular metabolic diseases on COVID-19 in China. *Clin Res Cardiol* **109**, 531-538, doi:10.1007/s00392-020-01626-9 (2020).

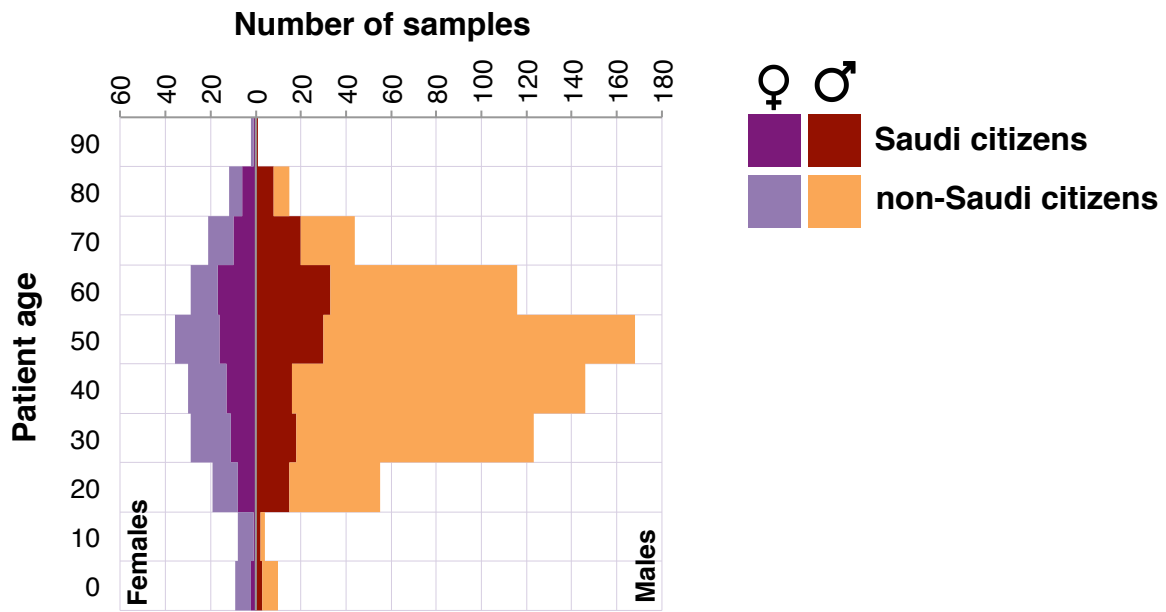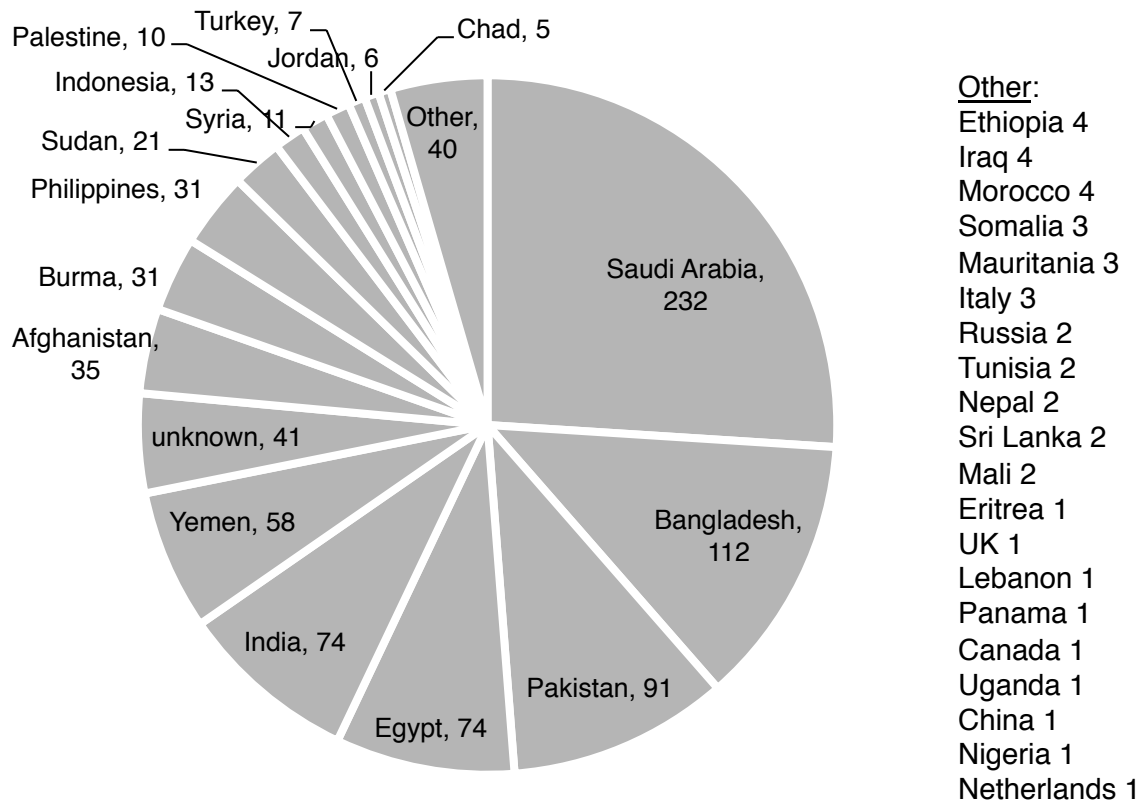

**Supplementary Figure S1**

Top: Patient age and gender shown for Saudi and non-Saudi citizens.

Bottom: Nationalities of patients. Numbers denote the total number of patients with a given nationality.

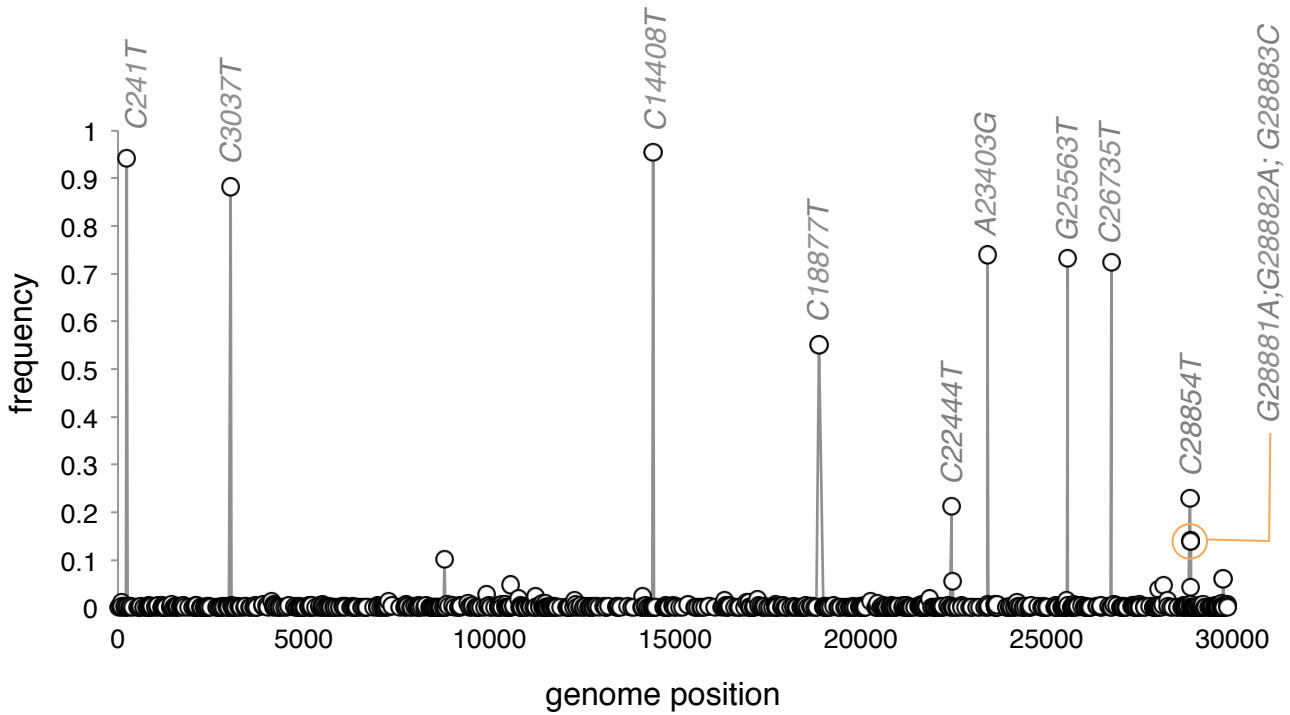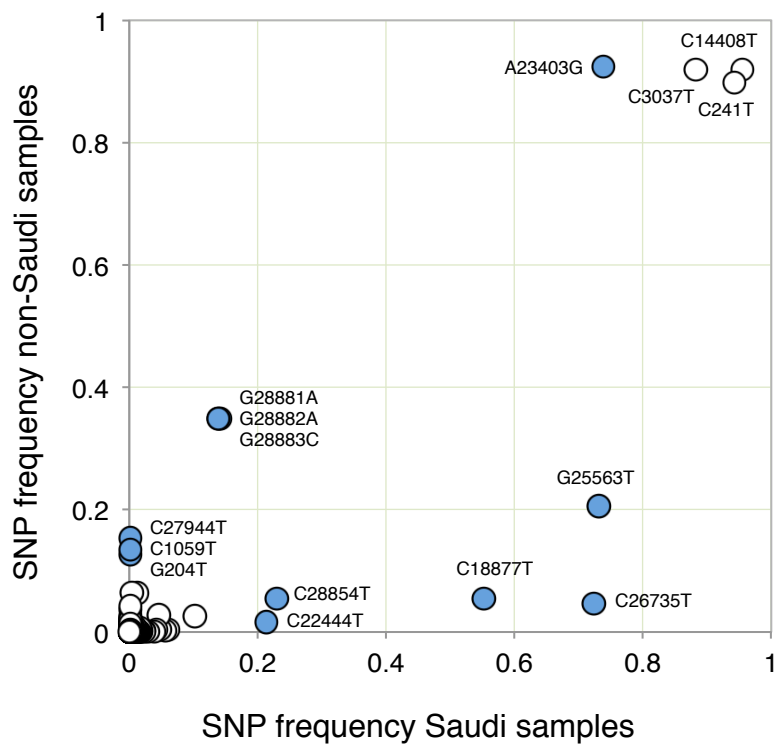

**Supplementary Figure S2**

Top: The 836 detected SNPs are shown along their positions in the SARS-CoV-2 genome (x-axis) and their frequency in the Saudi samples (y-axis).

High-frequency SNPs are highlighted along with the 3 SNPs underlying the R203K/G204R changes in the N protein (G28881A;G28882A;G28883C).

Bottom: Scatter plot of SNP frequencies in Saudi samples (y-axis) and in global, non-Saudi samples available from GISAID in 2020. SNPs differing by at least 0.1 in absolute values are highlighted in blue.

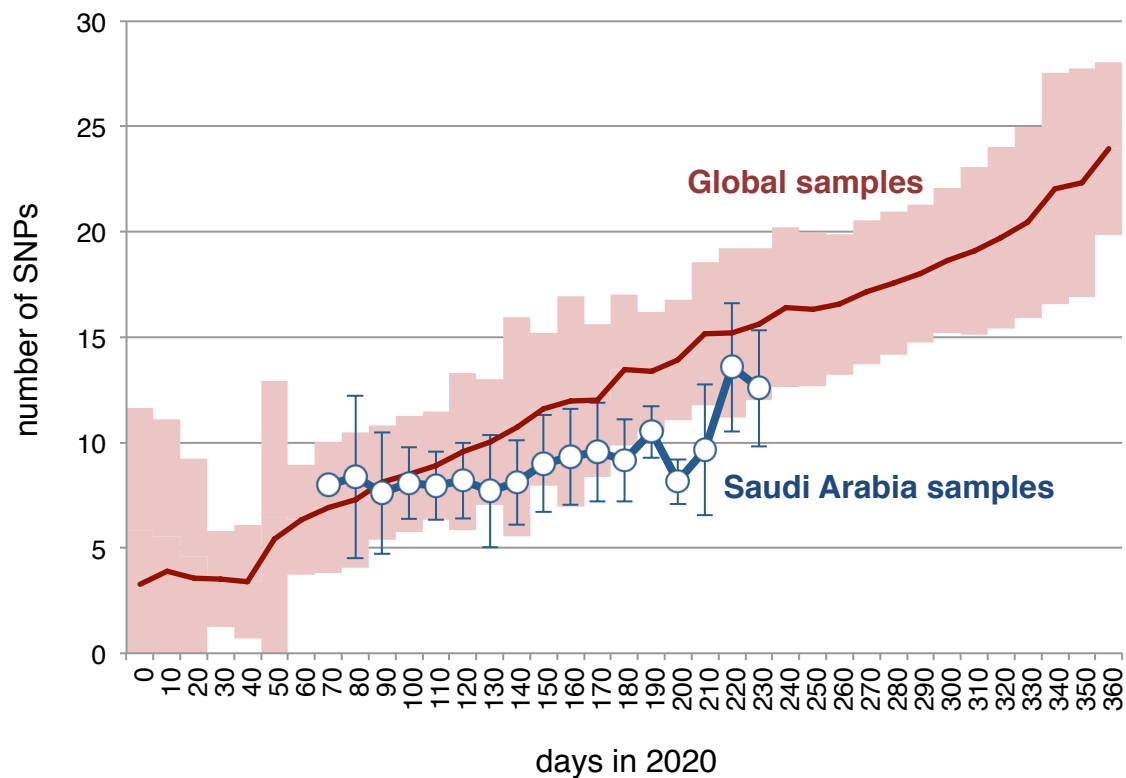

**Supplementary Figure S3**

Samples were grouped into 10-days periods according to their sampling date. The number of SNPs (compared to the Wuhan-Hu-1 reference) was recorded. Within each time group, the average number of SNPs and the standard deviation were then calculated.

Average SNPs in global samples – excluding Saudi Arabia – are shown as red line, with boxes showing plus/minus one standard deviation. Average SNPs in samples from Saudi Arabia are shown as blue line with whiskers denoting plus/minus one standard deviation.

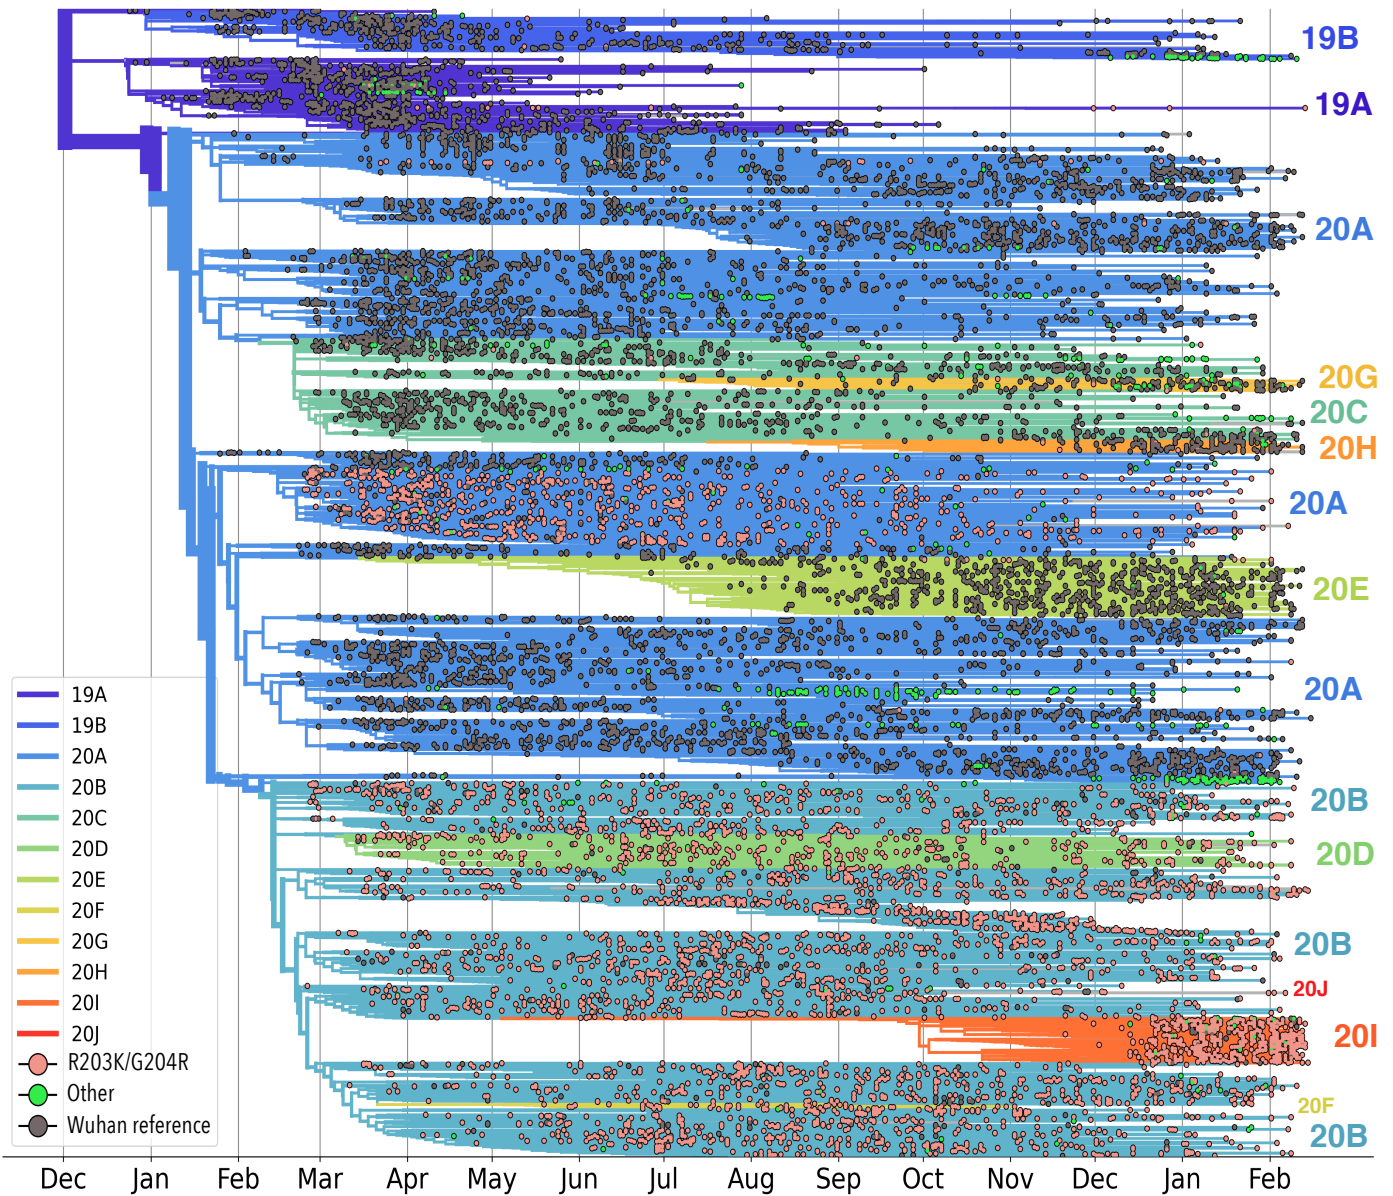

### Supplementary Figure S4

ML tree of 16,386 sequences dated with TreeTime showing the distribution of genotypes at genome positions 28,881-28,883. Samples are coloured according to their genotype and branches according to Nextstrain clades. R203K/G204R SNPs were identified from 590K samples submitted to GISAID on February 24, 2021, and are all included in the shown subset.

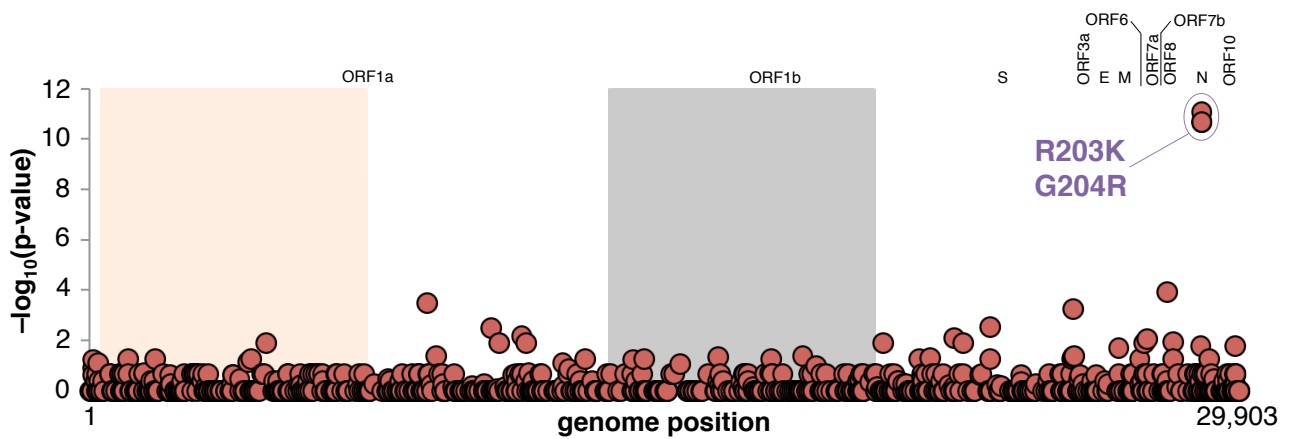

### Supplementary Figure S5

Manhattan plot showing the association between SARS-CoV-2 SNPs and recorded mortality in 850 samples from Saudi Arabia with available mortality information. Negative  $\log_{10}$ (uncorrected p-values) from Fisher's exact tests are shown as red circles. Gene boundaries are indicated by background colors (listed on top), and the three R203K/G204R SNPs (positions 28,881-28,883) in the N gene are highlighted.

| SNP        | Count   | Clade       | R203K/G204R counts |
|------------|---------|-------------|--------------------|
| <b>GGC</b> | 23      | 19A         | 22                 |
| <b>GAG</b> | 47      | 19B         | 4                  |
| <b>GAA</b> | 29      | 20A         | 523                |
| <b>AGG</b> | 563     | 20A.EU2     | 30                 |
| <b>AGC</b> | 27      | 20B         | 114,487            |
| <b>AAG</b> | 26      | 20C         | 12                 |
| <b>AAC</b> | 232,475 | 20D         | 5,671              |
|            |         | 20E (EU1)   | 15                 |
|            |         | 20F         | 12,593             |
|            |         | 20G         | 2                  |
|            |         | 20H/501Y.V2 | 5                  |
|            |         | 20I/501Y.V1 | 98,552             |
|            |         | 20J/501Y.V3 | 245                |

### Supplementary Figure S6

Global samples from GISAID (February 24th 2021).

Left: Counts of partial and full R203K/G204R SNPs at genome position 28,881-28,883, where the Wuhan reference has the GGG genotype.

Right: Counts of R203K/G204R SNPs in different Nextstrain clades.

**A**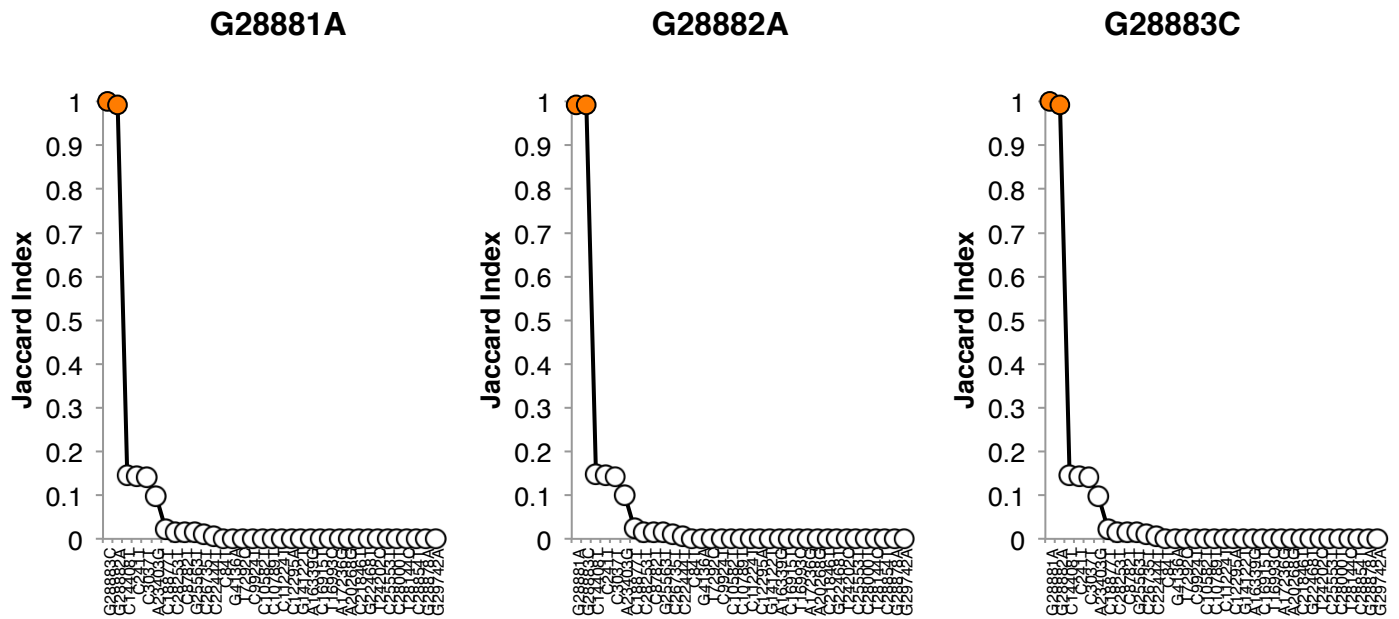**B**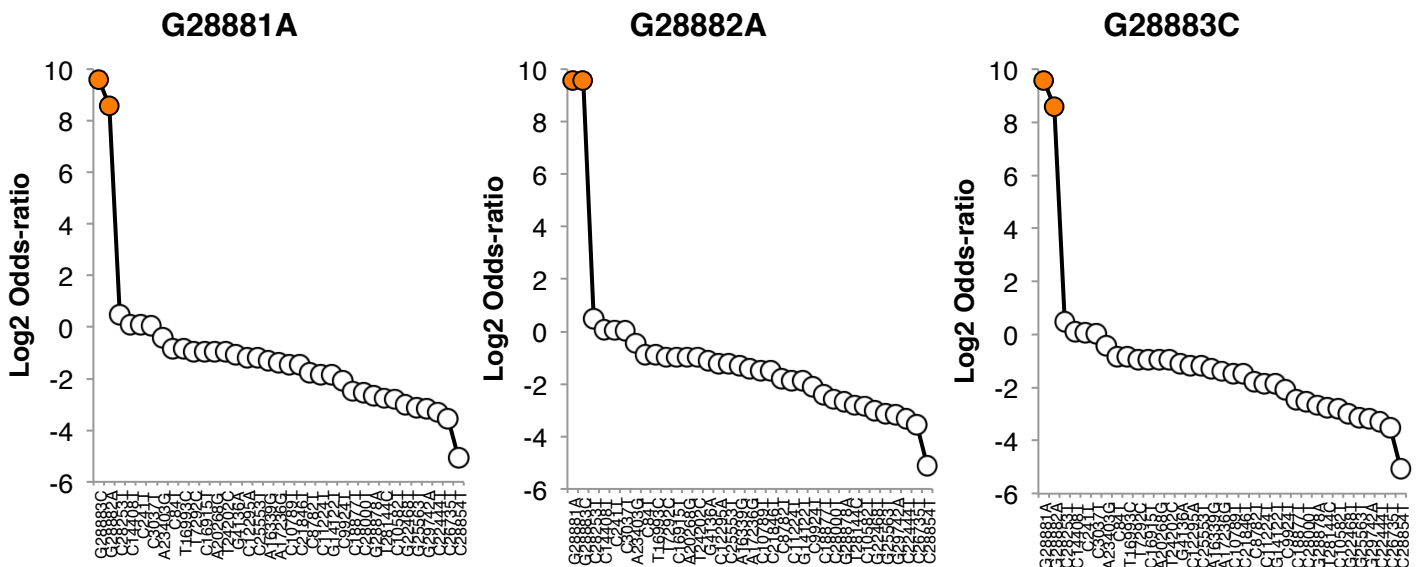**Supplementary Figure S7**

Co-occurrences between the R203K/G204R SNPs and other SNPs in 892 SARS-CoV-2 genomes from Saudi Arabia shown as Jaccard Index (A) and log<sub>2</sub> odds-ratio (B). The co-occurrence between the three SNPs in the R203K and G204R mutations (genomic mutations shown above plots) and all SNPs present in at least 20 samples (x- axes) are shown as circles. Co-occurrences between the three SNPs (G28881A, G28882A, and G28883C) are highlighted in orange.



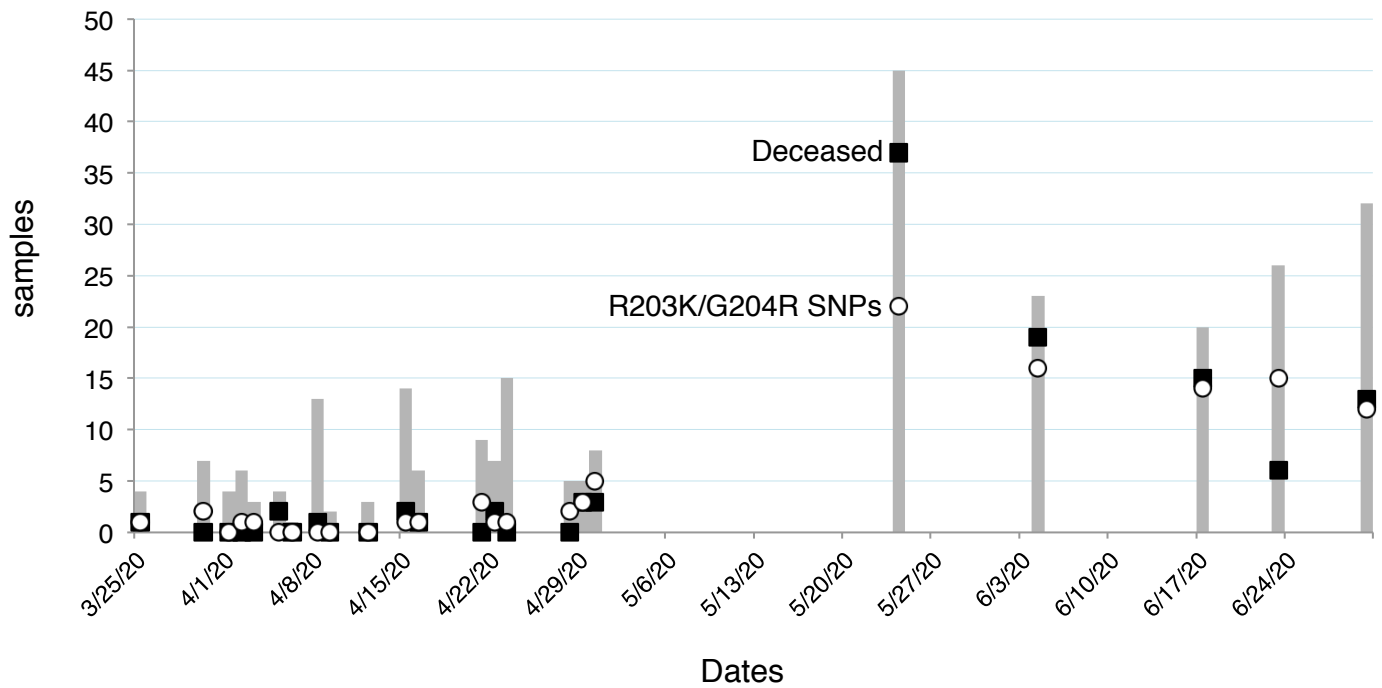

**Supplementary Figure S8**

Bar chart showing the number and collection dates of samples from King Abdullah Medical Centre in Jeddah. The number of samples from deceased patients are shown as black squares on the bars, and the number of samples containing the R203K/G204R SNPs shown as open circles.

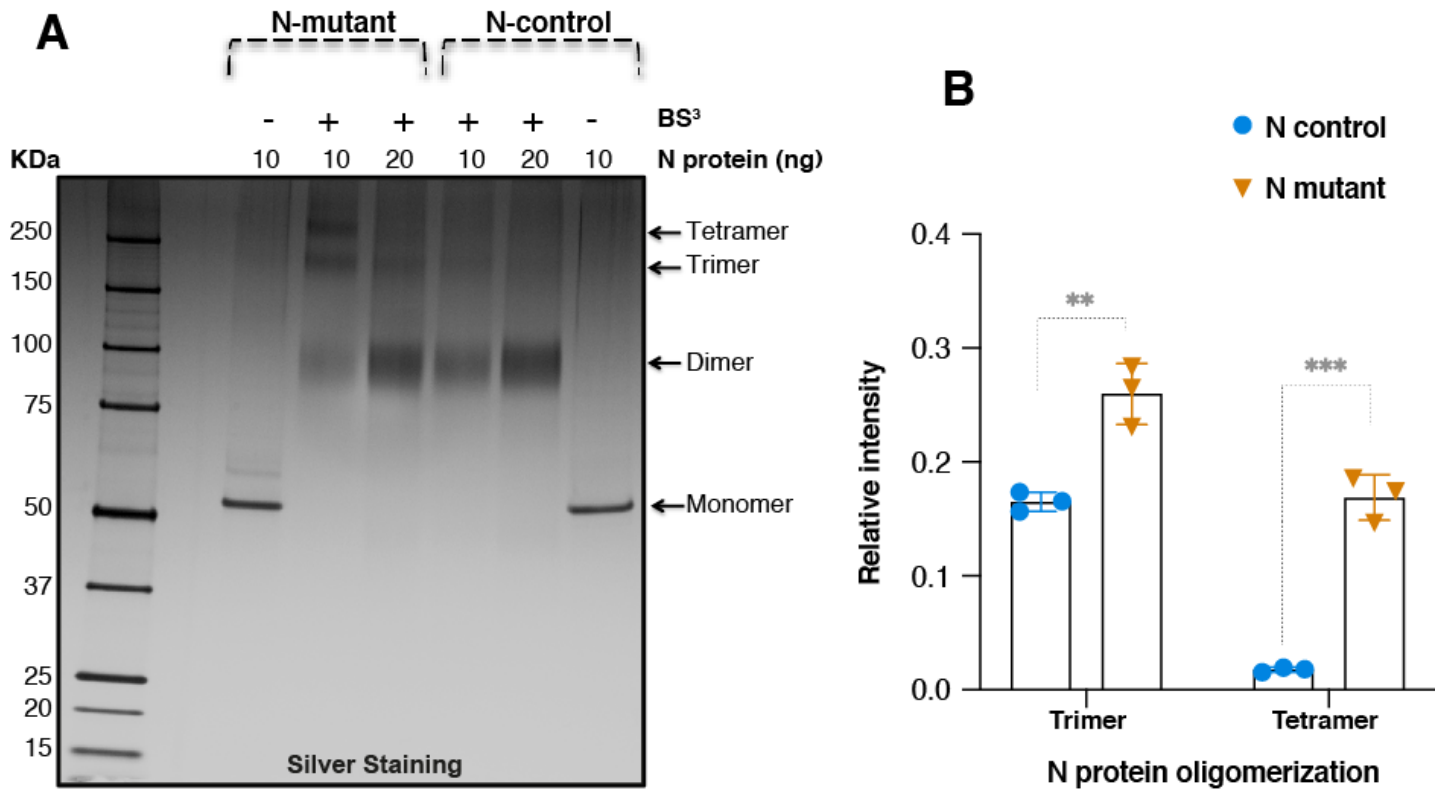

### Supplementary Figure S9

Oligomerization analysis of mutant and control N protein. A) BS<sup>3</sup> cross-linking (2mM) and SDS-PAGE analysis of the oligomerization forms of mutant and control N proteins. Proteins were separated on SDS-PAGE and subjected to silver staining. B) Densitometry analysis of bands corresponding to oligomeric forms (trimer and tetramer) was performed. Bar-plot represents the relative intensities from three independent experiments (as shown mean  $\pm$  SD). (Unpaired two-sided t-test, p values (0.000203<sup>\*\*\*</sup>) and (0.00427<sup>\*\*</sup>)).

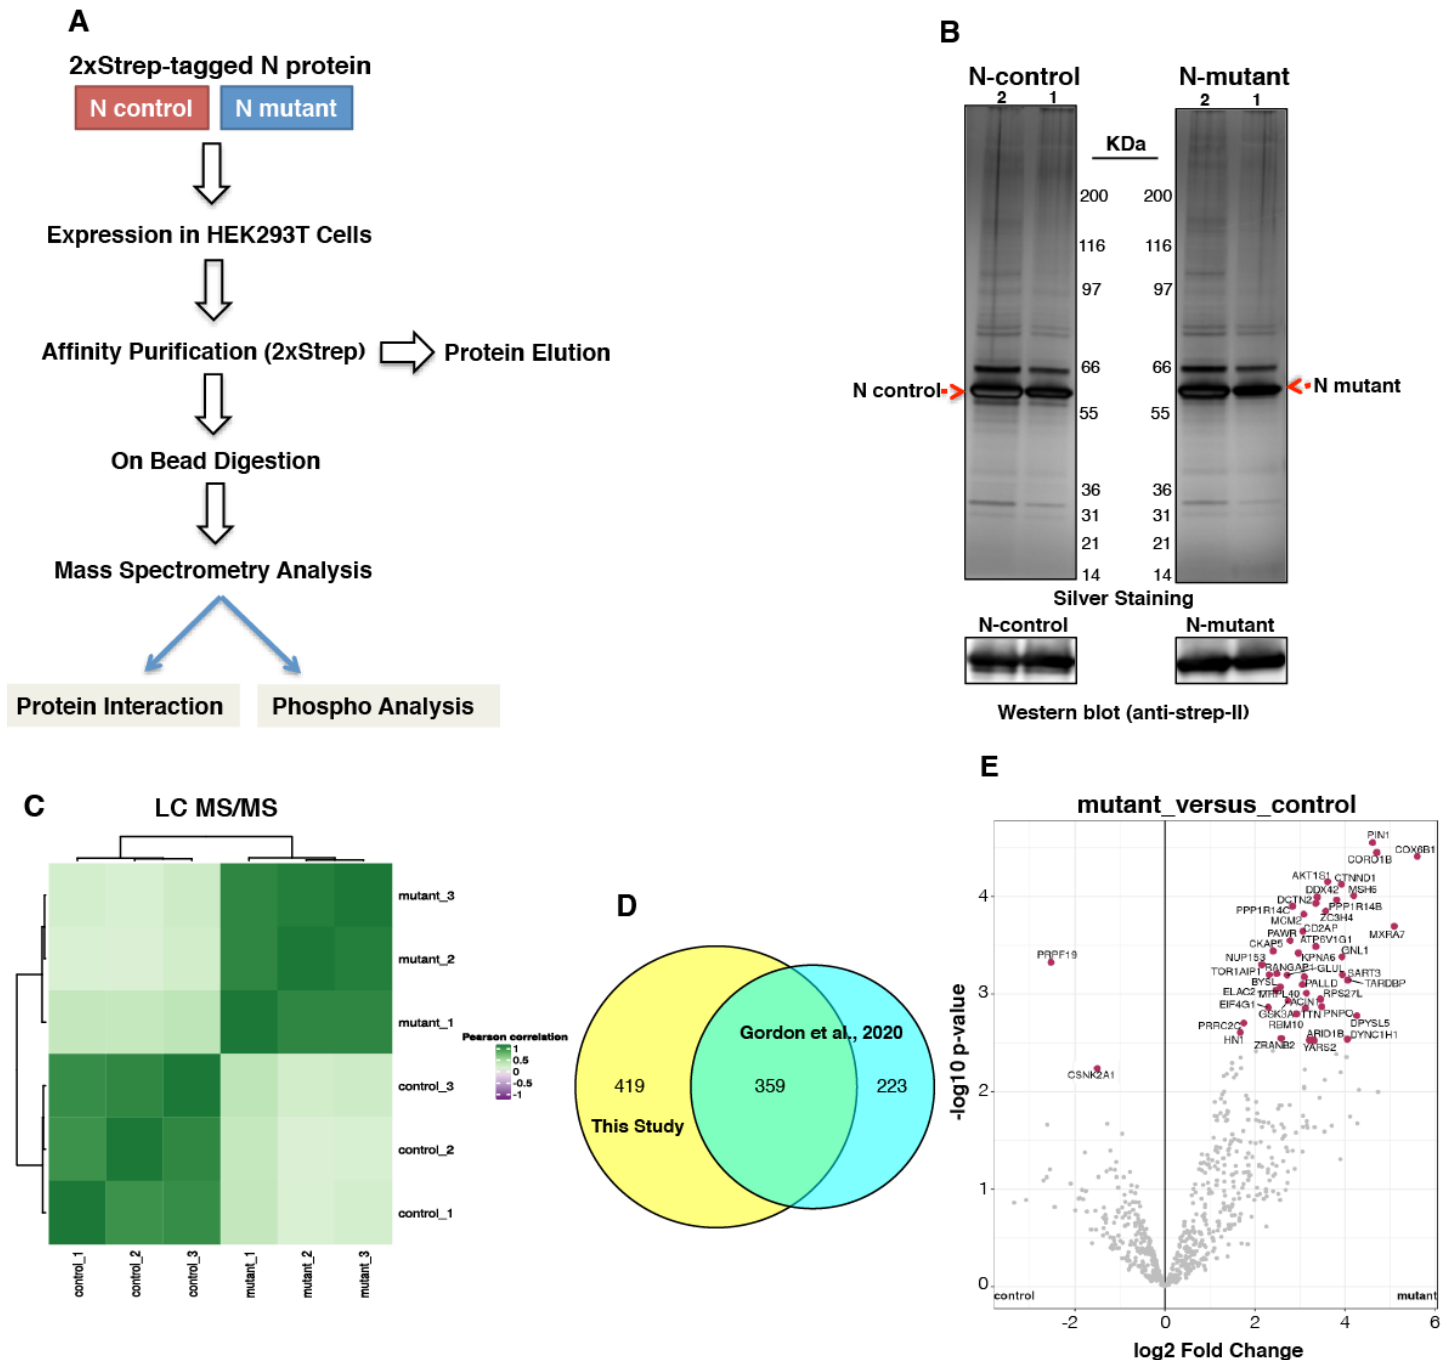

### Supplementary Figure S10

Affinity mass spectrometry (AP-MS) analysis of mutant and control SARS-CoV-2 N protein and host protein interaction. A) Sketch showing the workflow of affinity mass spectrometry procedure. HEK-293 cell expressing 2XStrep-tagged control and mutant N protein were used for MagStrep affinity purification. Purified proteins were separated on SDS-PAGE and subjected to silver staining and western blotting for confirmation. After confirmation, interacting proteins were analyzed by mass spectrometry. B) (Upper) Silver staining of control and mutant N protein associated host proteins (1 and 2 show two loading volume), n=3 independent experiments were performed. (Lower) Western blot confirmation of N protein (mutant and control) using anti-Strep antibody. A full scan is available as Figure S12. C) Correlation matrix of three replicates for control and mutant N protein AP-MS. D) Overlapping of identified N interacting proteins with N-interacting proteins reported in previous study<sup>27</sup> (Gordon et al., 2020 *Nature*). E) Volcano plot displaying the differential interactions of pairwise comparisons (mutant\_vs\_control) in  $-\text{Log}_{10}$  adj. p-values vs. the  $\text{Log}_2$  protein fold change. Proteins with statistically significant (Adjusted p-value  $\leq 0.05$ , and Log fold change  $\geq 1$ ) difference between mutant and control AP-MS conditions are highlighted.

# Supplementary Figure S11

**A**

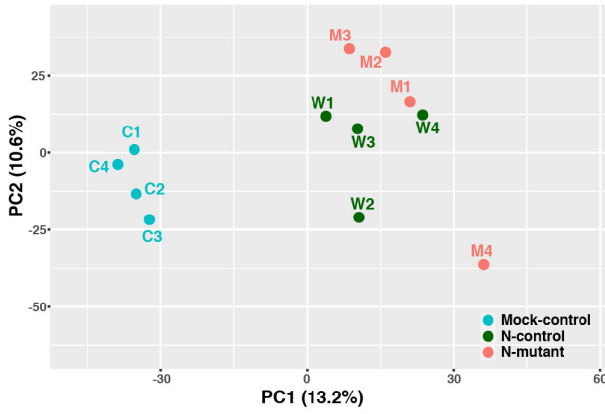

**B**

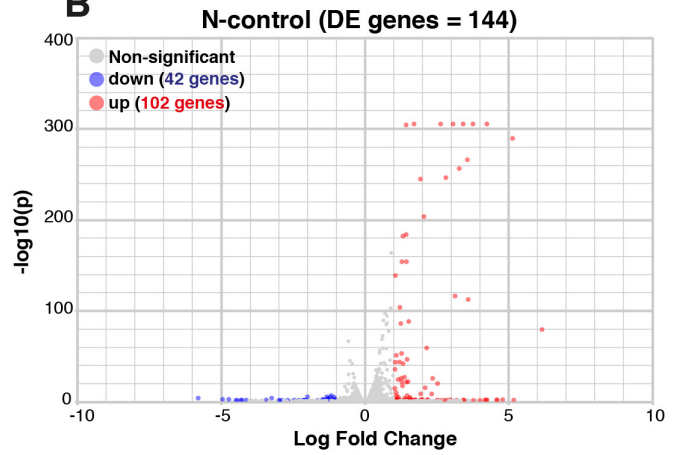

**D**

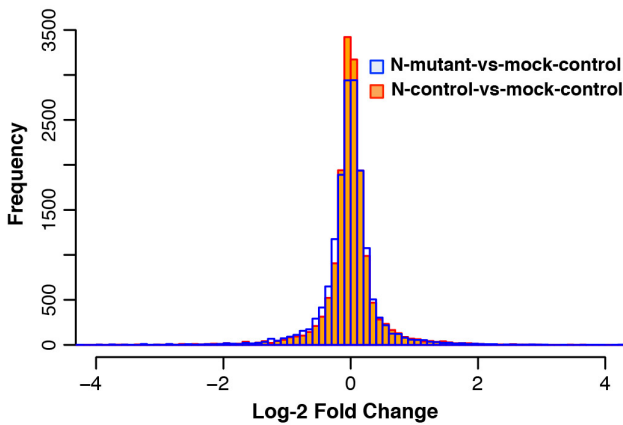

**C**

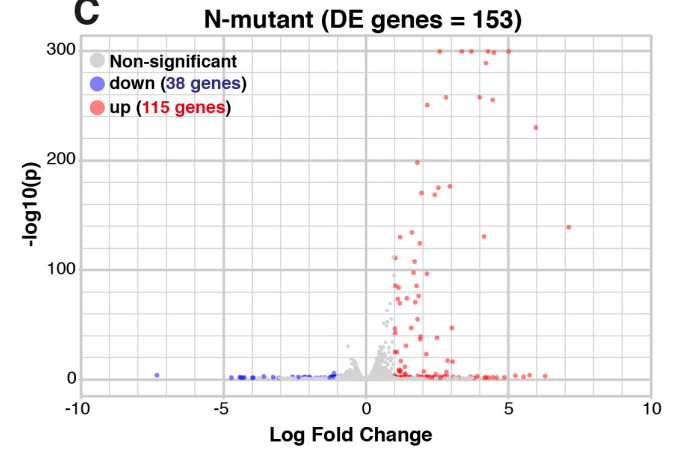

**E**

## GO-Biological Processes Enrichment

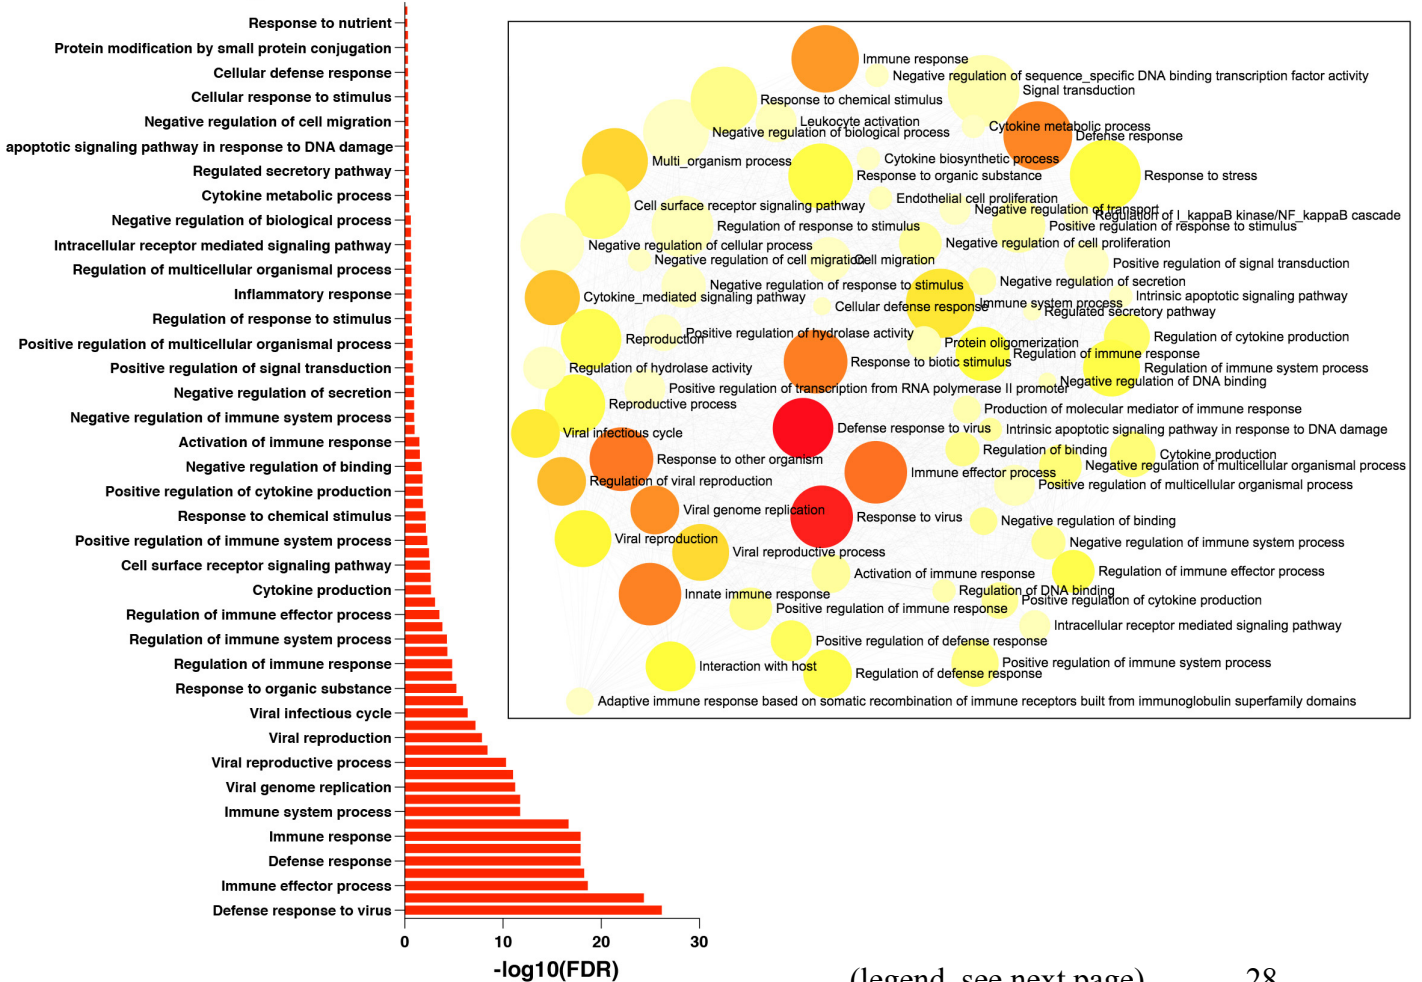

(legend, see next page)

**Supplementary Figure S11. Transcriptomic analysis of mutant and control N transfected host cells.**

**A)** PCA on transcriptome of Calu-3 cells transfected with plasmids expressing the full-length N-control and N-mutant protein along with mock control. **B-C)** Volcano-plot showing differentially expressed (DE) genes based on a filtering criterion of adj p-value  $< 0.05$  and fold-change cutoff  $\geq 1$ ) as determined by the method EdgeR in NetworkAnalyst tool. X-axis depicts  $\log_2$  fold-change of DE genes and Y-axis depicts  $-\log_{10}$  P-value. Genes with significant up-regulation are shown in red and down-regulated are shown in blue. All other non-significant genes are shown in gray. **D)** Plot showing the distribution of  $\log_2$ -fold changes in both N-mutant and N-control conditions. **E)** GO enrichment analysis of all DE genes in the N-mutant condition. The enriched GO BP (Biological Processes) terms are displayed by plotting against the  $-\log_{10}$  of the false discovery rate (FDR q value). The enriched terms display an interconnected network with overlapping gene sets (from the list). Each node represents an enriched term and colored by its FDR q value (red color shows the lowest values as shown in the bar-chart and Supplementary Data 6). The size of each node corresponds to number of linked genes from the list.

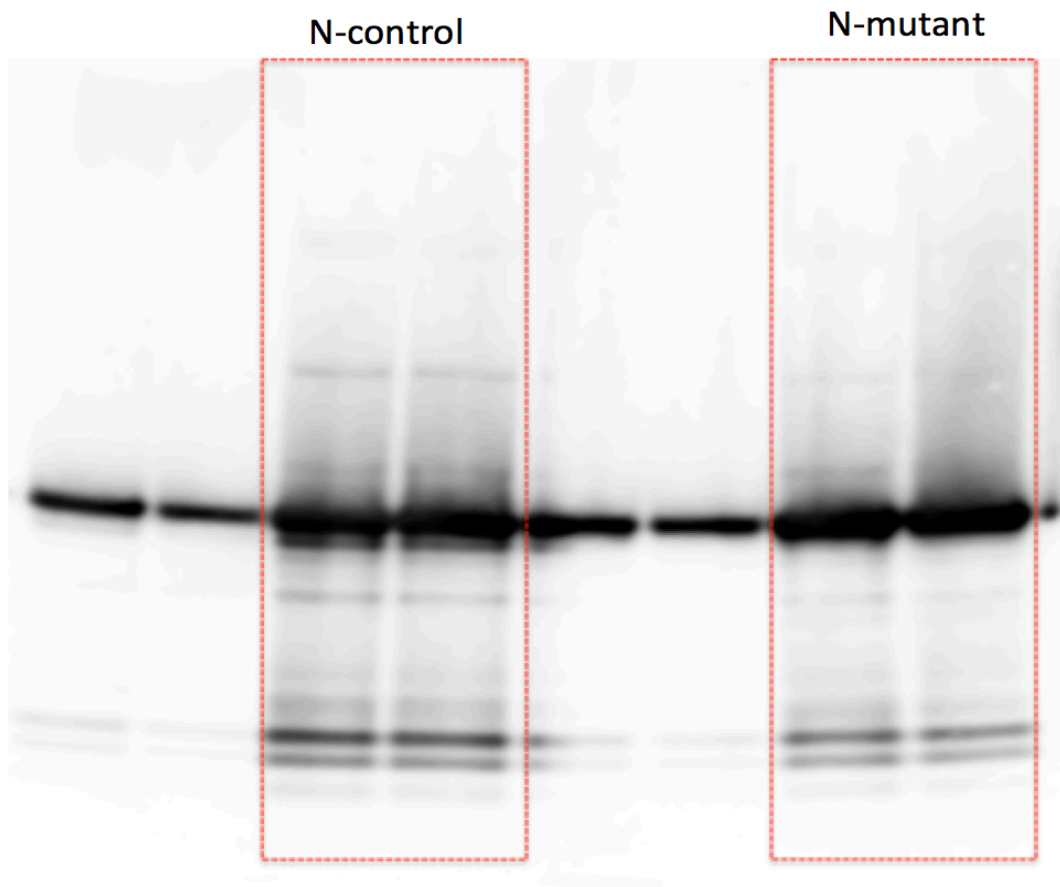

**Supplementary Figure S12**  
Full scan for Supplementary Figure S10b (lower panel)
